# Supplementary material for: Astaxanthin improves the development of the follicles and oocytes through alleviating oxidative stress induced by BPA in cultured follicles
Source: PubMed Central journal article supplement (PMC9098901; doi:10.1038/s41598-022-11566-1), 2022-05-12

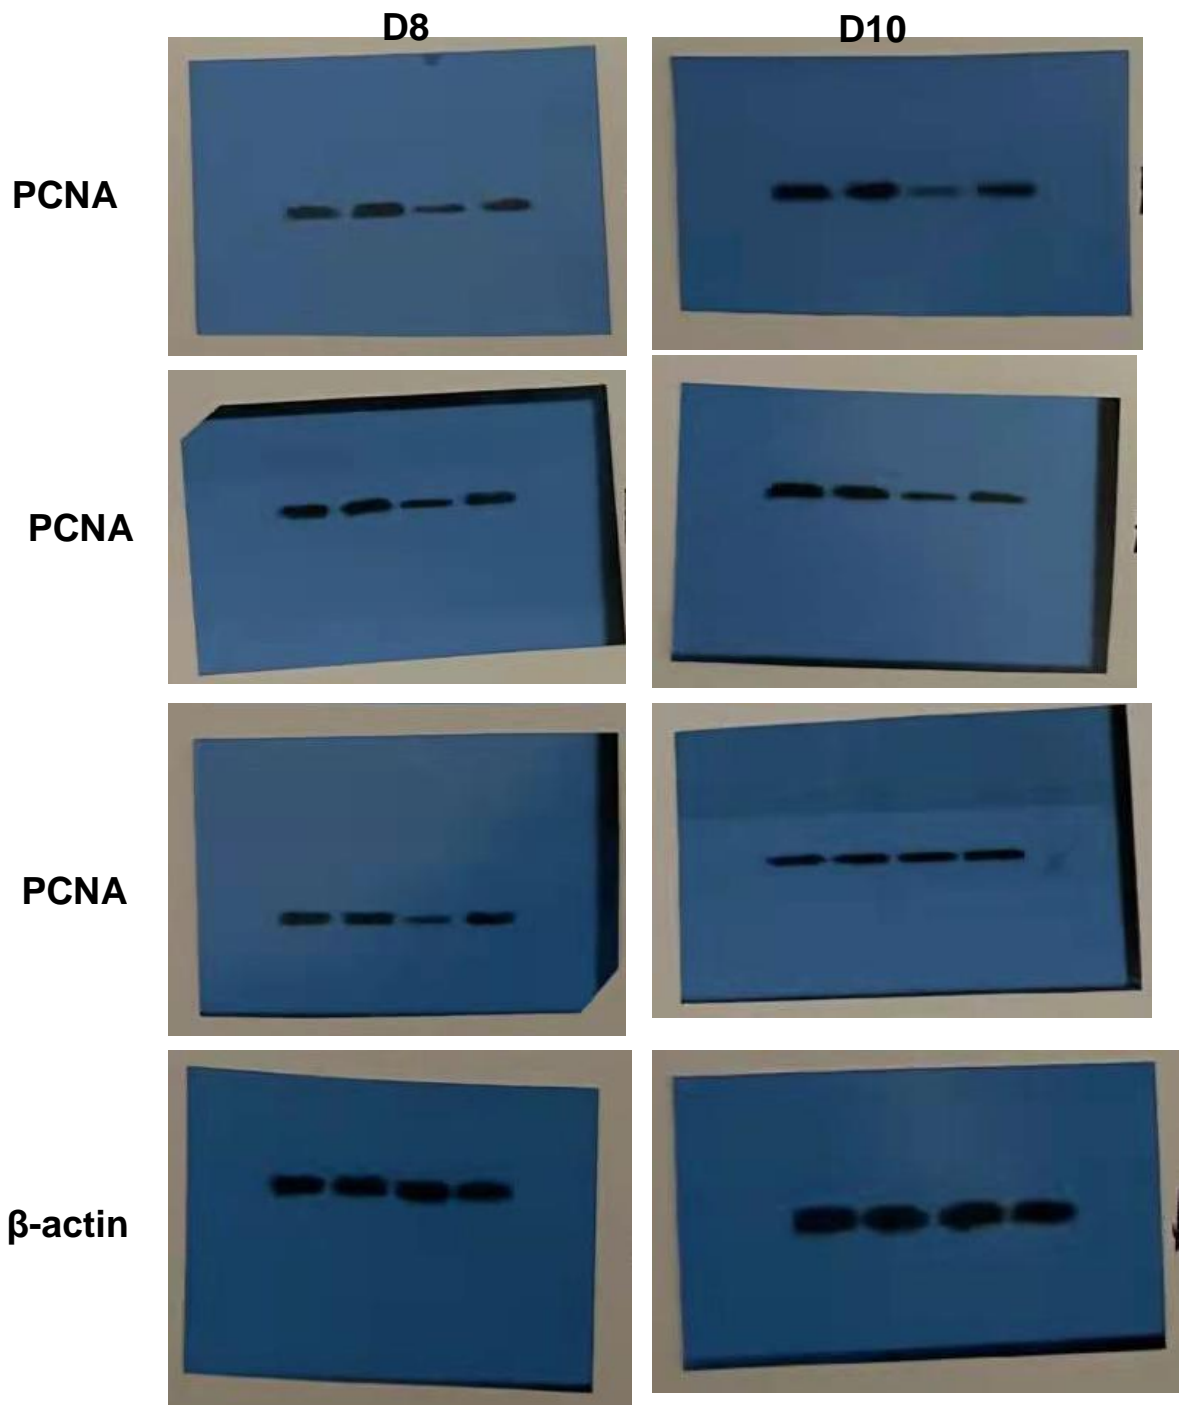

D10

ER $\alpha$

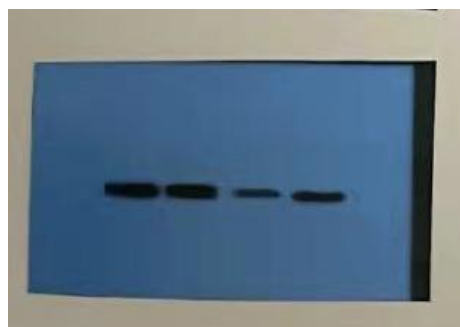

ER $\alpha$

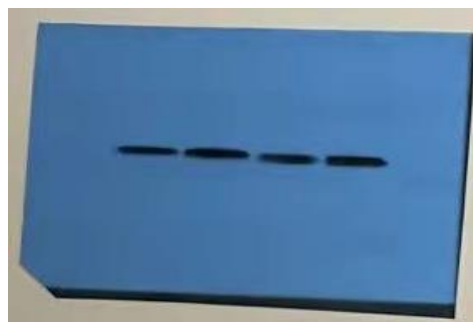

ER $\alpha$

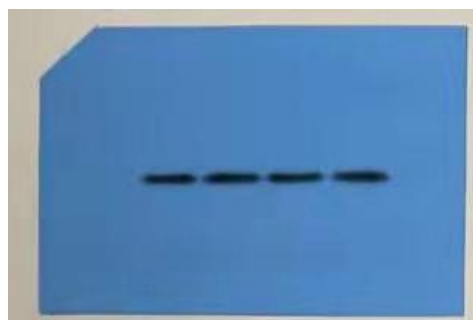

$\beta$ -actin

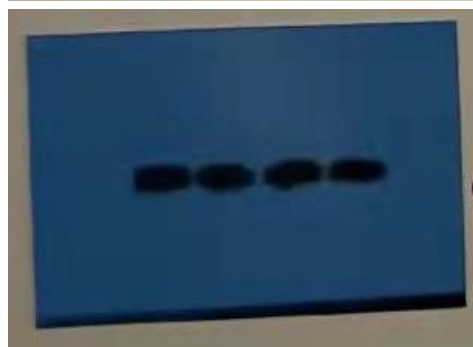

Supplement: 41598_2022_11566_MOESM1_ESM.pdf [file 41598_2022_11566_MOESM1_ESM.pdf]
